# Supplementary material for: The facile preparation of solid-state fluorescent carbon dots with a high fluorescence quantum yield and their application in rapid latent fingerprint detection
Source: Royal Society of Chemistry journal article supplement (doi:10.1039/d1dt01510a), 2021-01-01
Supplement: d1dt01510a1.pdf [file d1dt01510a1.pdf]

## Supplementary information

### Facile preparation of solid-state fluorescent carbon dots with high fluorescence quantum yield and application in rapid latent fingerprints detection

Hai-Jiao Wang <sup>1,\*</sup>, Wan-Yi Hou <sup>1</sup>, Jing Kang <sup>2</sup>, Xin-Yu Zhai <sup>1</sup>, Hong-Li Chen <sup>1</sup>, Yong-Wei Hao

<sup>1</sup>, Guo-Yun Wan <sup>1,\*</sup>

<sup>1</sup> The Key Laboratory of Biomedical Material, School of Life Sciences and Technology, Xinxiang Medical University, Xinxiang 453003, China.

<sup>2</sup>. College of Life Sciences, Xinxiang Medical University, Xinxiang, 453003, China

\* Corresponding author: taiyiyibo@126.com (H. Wang), wanguoyun@xxmu.edu.cn (G. W)

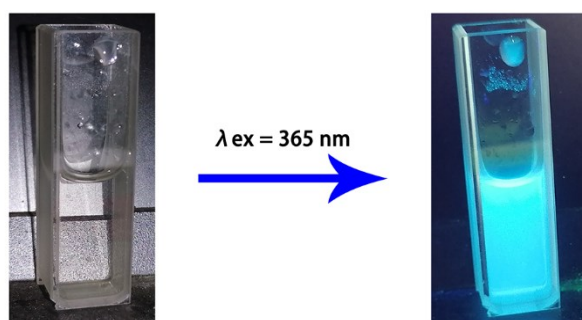

**Fig. S1.** Photographs of ScCDs aqueous solution under daylight and UV light.

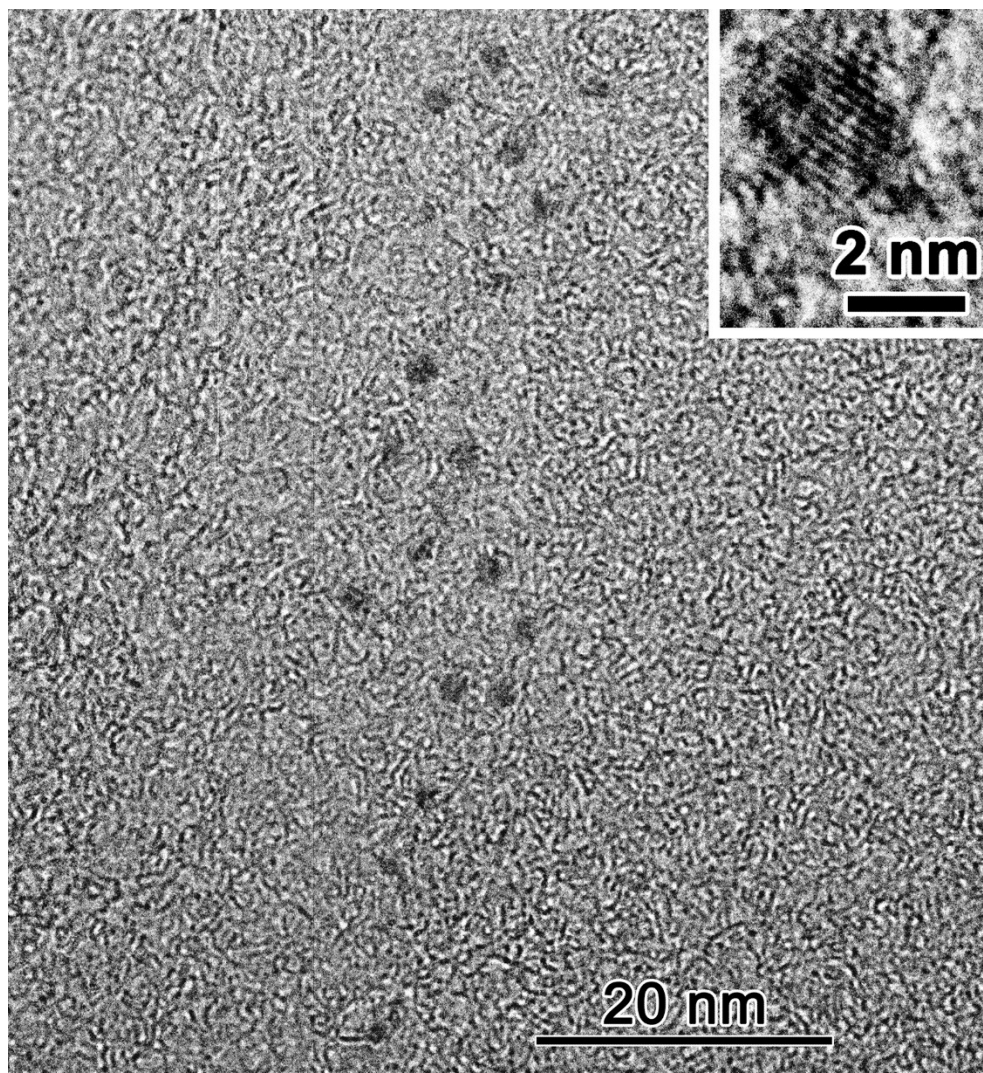

**Fig. S2.** TEM images of ScCDs.

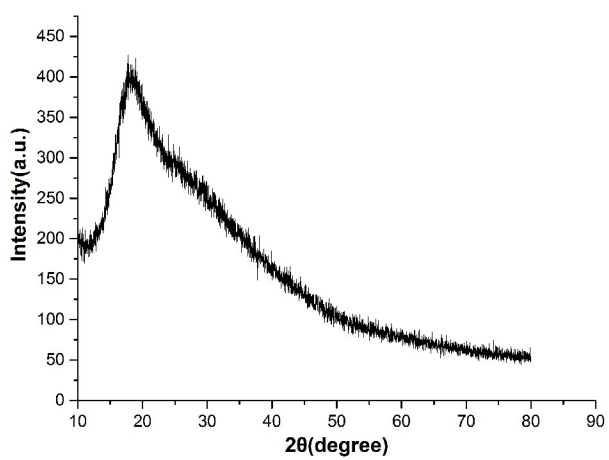

**Fig. S3.** XRD patterns of the ScCDs powder.

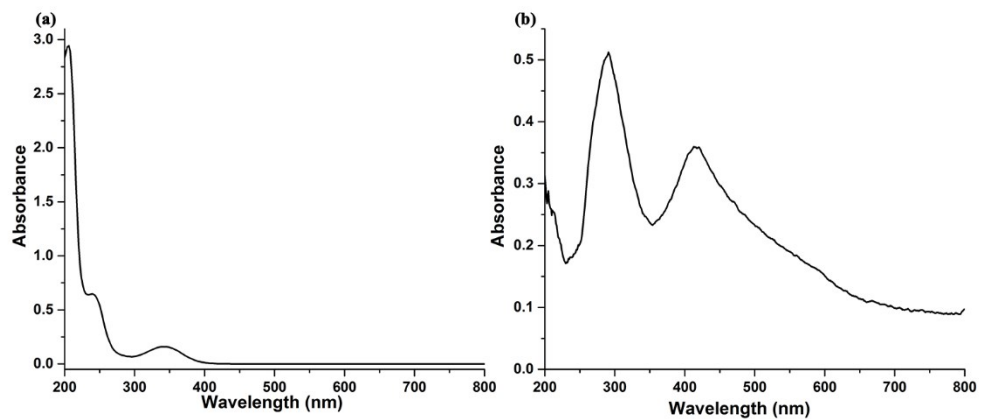

**Fig. S4.** (a) UV-Vis absorption spectra of ScCDs in aqueous solution. (b) UV-Vis absorption spectra of ScCDs powder.

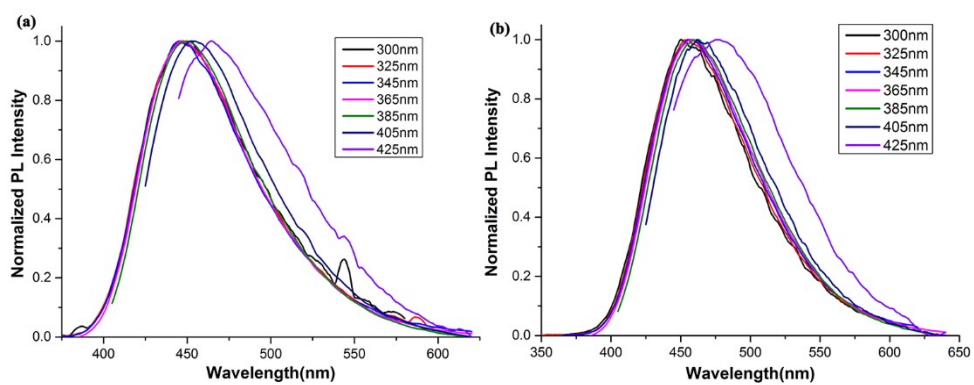

**Fig. S5.** (a) Normalized PL spectra of ScCDs powder at different excitation wavelengths. (b) Normalized PL spectra of ScCDs in aqueous solution at different excitation wavelengths.

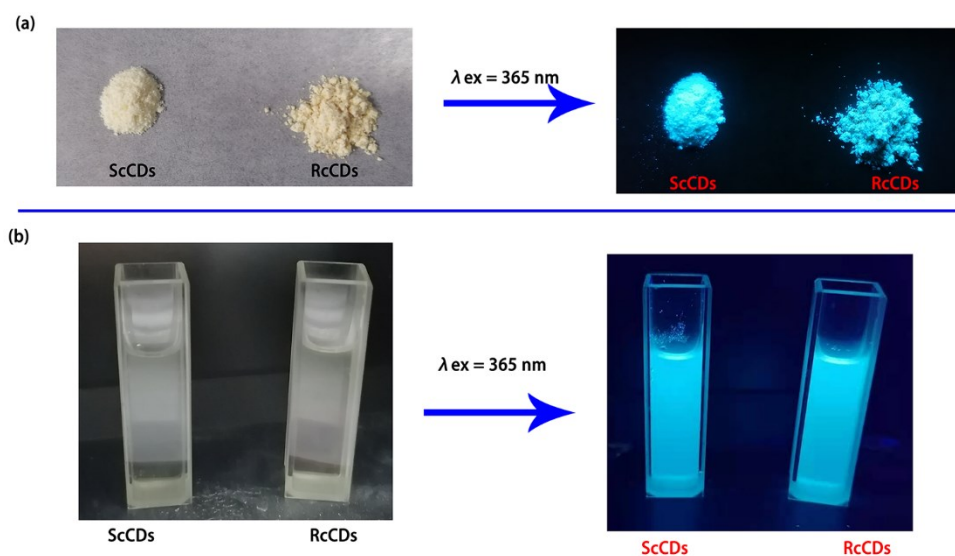

**Fig. S6.** (a) Photographs of ScCDs powder and RcCDs powder under daylight and UV light. (b) Photographs of ScCDs and RcCDs aqueous solution under daylight and UV light.

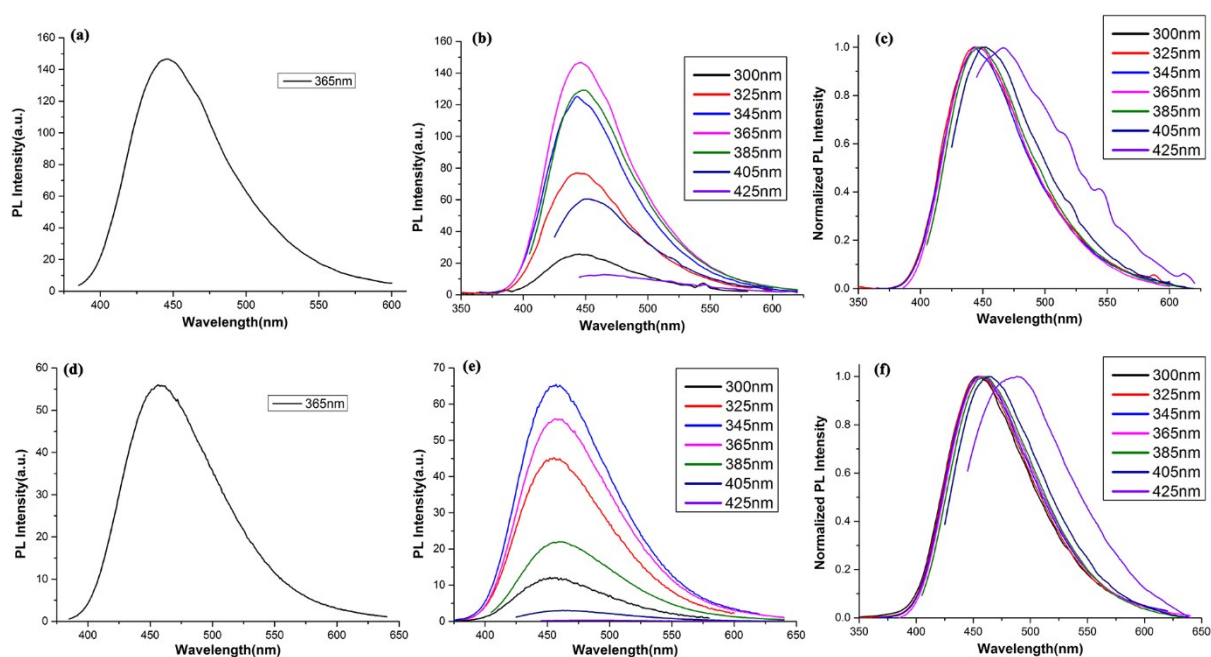

**Fig. S7.** (a)-(c) PL spectra of the RcCDs powder. (d)-(f) PL spectra of the RcCDs in aqueous solution.

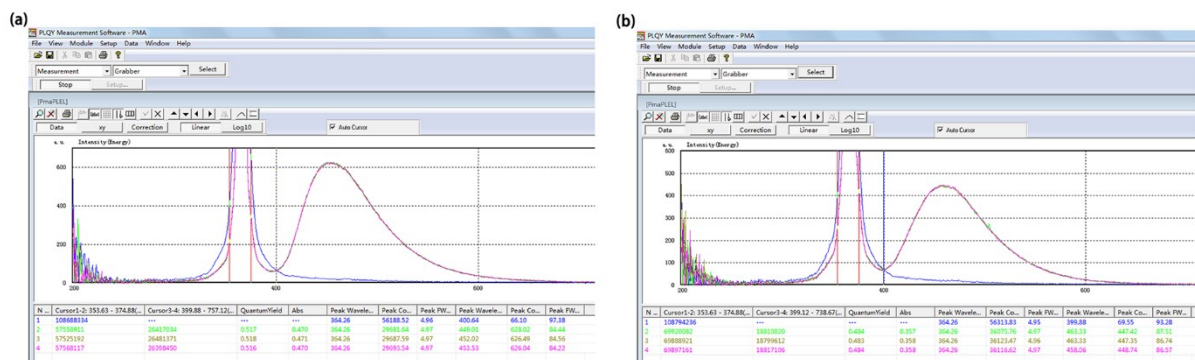

**Fig. S8.** (a) The absolute QY of CDs powder. (b) The absolute QY of CDs in aqueous solution.

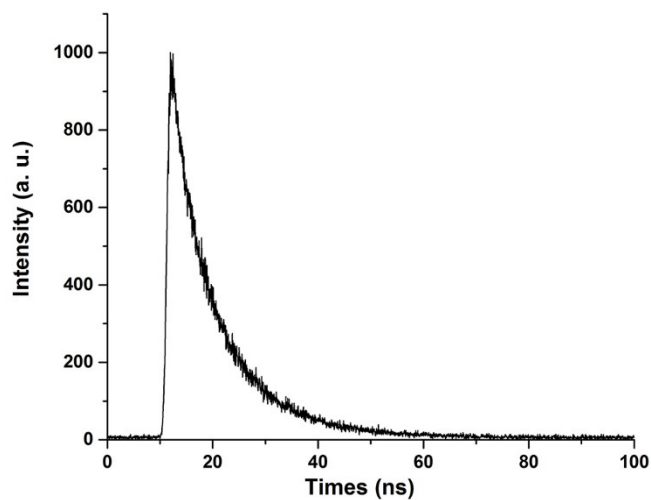

**Fig.S9.** Fluorescence decay of ScCDs powder (Ex = 365 nm, Em = 447 nm)

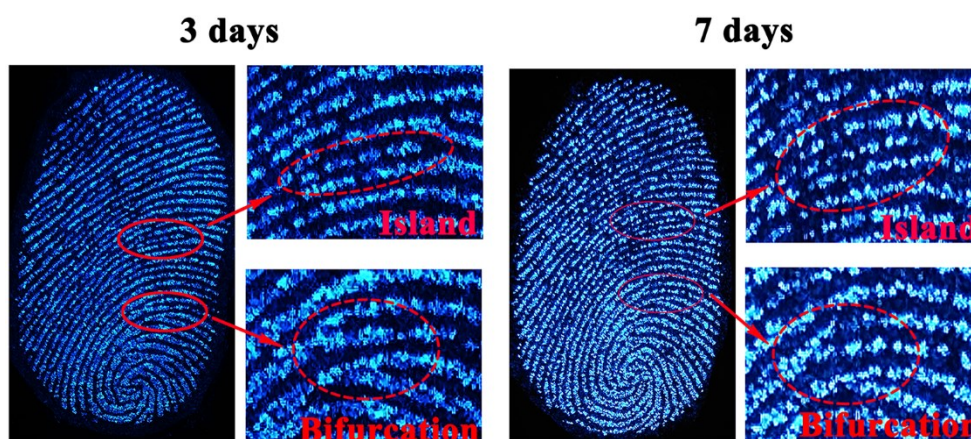

**Fig. S10.** Photographs of the LFPs which is stored for a period of time before it is developing.

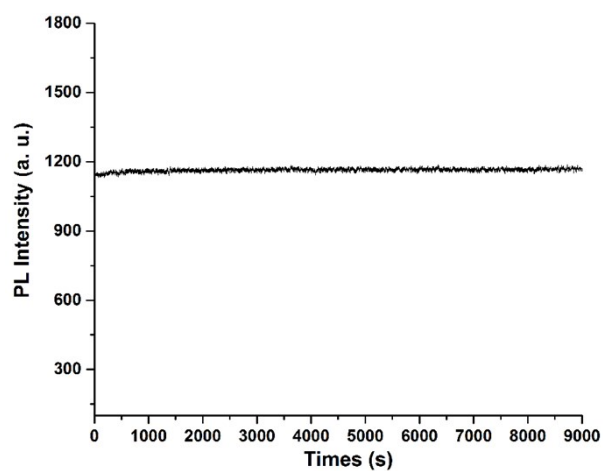

**Fig. S11.** Photostability of ScCDs powder.

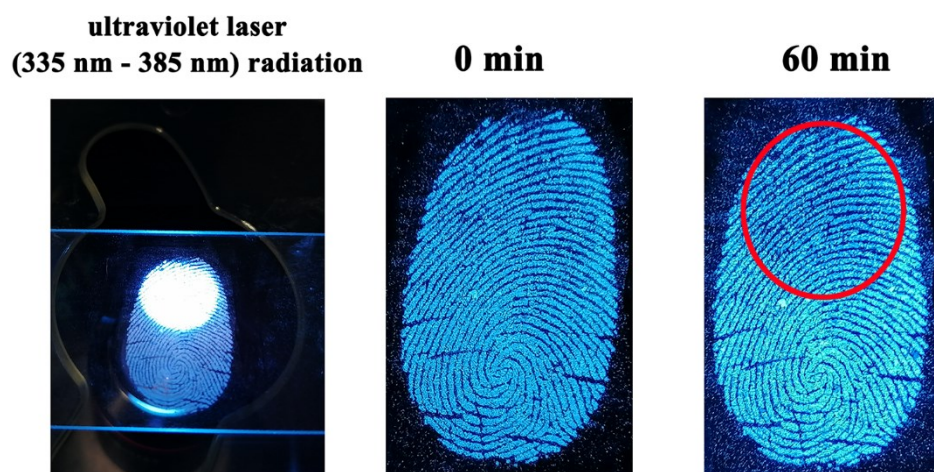

**Fig. S12.** ScCDs powder stained LFPs on glass slide under under ultraviolet laser (335 nm - 385 nm, with the maximum power) radiation on the Olympus CKX53 inverted fluorescence microscope. The red circle represents irradiated parts.

**Table S1** The atomic percentages of ScCDs.

|       | C (%) | N (%) | O (%) |
|-------|-------|-------|-------|
| ScCDs | 67.3  | 12.8  | 19.9  |
